# Supplementary material for: DNA origami: thinking ‘outside the fold’ for direct integrity testing of membranes for virus removal in potable reuse applications
Source: Royal Society of Chemistry journal article supplement (doi:10.1039/d4ew00285g), 2024-01-01
Supplement: d4ew00285g1.pdf [file d4ew00285g1.pdf]

*Supplementary Information*

**DNA Origami: Thinking ‘Outside the Fold’ for Direct Integrity Testing  
of Membranes for Virus Removal in Potable Reuse Applications**

Hannah Ray<sup>1</sup>, Katerina Papp<sup>1</sup>, Leopold Green<sup>2</sup>, Boo Shan Tseng<sup>3</sup>, Eric Dickenson<sup>1</sup>, and Daniel Gerrity<sup>1\*</sup>

<sup>1</sup> Southern Nevada Water Authority, P.O. Box 99954, Las Vegas, NV, 89193, USA

<sup>2</sup> Purdue University, 610 Purdue Mall, West Lafayette, Indiana, 47907, USA

<sup>3</sup> University of Nevada Las Vegas, 4700 S. Maryland Parkway, Las Vegas, NV, 89119, USA

\*Corresponding author: [Daniel.Gerrity@snwa.com](mailto:Daniel.Gerrity@snwa.com)

**Keywords:** nanofiltration (NF); reverse osmosis (RO), log reduction value (LRV); MS2 bacteriophage;  
DNA nanostructure; quantitative polymerase chain reaction (qPCR)

**Figure S1.** Photographs of the single-element membrane system. **(Left)** Direction of flow is described and indicated by arrows. **(Right)** Due to the batch/recirculating configuration of the system, the feed water was constantly cooled to prevent temperature increases. This was accomplished by placing the feed-containing aluminum tank in a larger plastic tank filled with single-pass cooling water. The feed water to the system consisted of a full-scale tertiary effluent (primary clarification; activated sludge with full nitrification, partial denitrification, and biological phosphorus removal; secondary clarification; and ultrafiltration) that was pH-adjusted from 7.3 to 6.9 using sulfuric acid. Aliquots of each spiking stock (see main text) were added to the water, and the water was manually mixed. A 50-mL sample was collected into a conical tube to represent the combined feed water in the tank at time zero. The feed pump was then started, and the water was allowed to recirculate for 30 min prior to sample collection, at which point 50-mL feed and permeate samples were collected every 5-15 min.

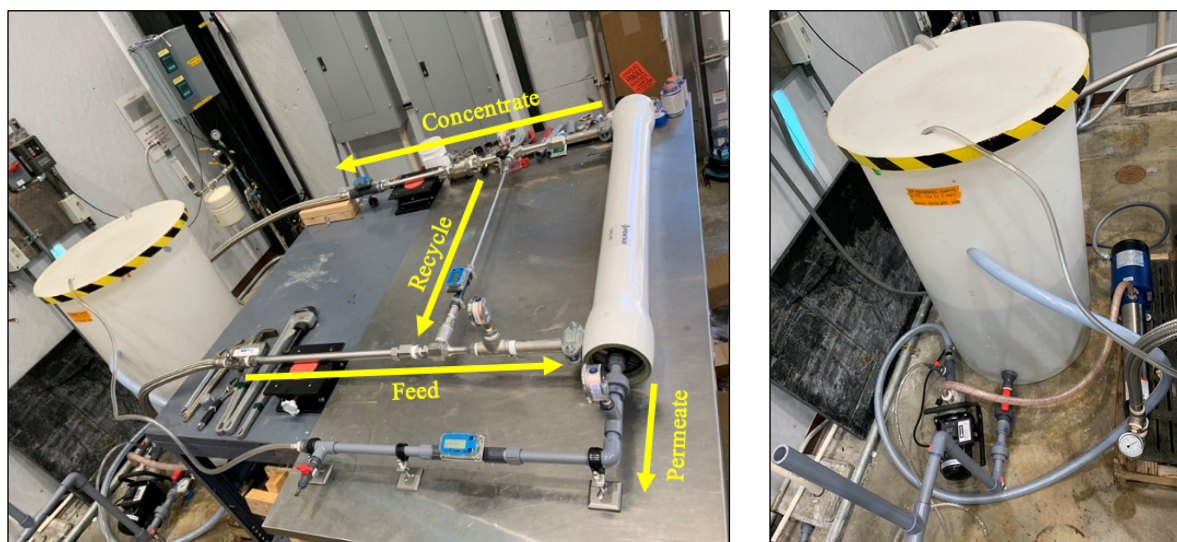

**Table S1.** Summary of general water quality parameters for the full-scale tertiary effluent (averages of two sample events). The treatment train consists of primary clarification, activated sludge (full nitrification, partial denitrification, and biological phosphorus removal), secondary clarification, and ultrafiltration.

| Water Quality Parameter      | Units                        | Value      |
|------------------------------|------------------------------|------------|
| pH                           |                              | 7.0        |
| Total organic carbon (TOC)   | mg-C/L                       | 6.0        |
| Electrical conductivity (EC) | $\mu\text{S}/\text{cm}$      | 1678       |
| Alkalinity                   | mg/L as $\text{CaCO}_3$      | 94         |
| Turbidity                    | NTU                          | <1         |
| $\text{UV}_{254}$            | $\text{cm}^{-1}$             | 0.12       |
| Nitrate                      | mg-N/L                       | 12         |
| Nitrite                      | mg-N/L                       | <0.10      |
| Ammonia                      | mg-N/L                       | 0.65       |
| Calcium                      | mg/L                         | 92         |
| Magnesium                    | mg/L                         | 38         |
| Hardness                     | mg/L as $\text{CaCO}_3$ (mM) | 386 (3.86) |

**Table S2.** Summary of operational conditions for each membrane.

| <b>Operational Parameter</b> | <b>Units</b> | <b>RO<br/>Hydranautics<br/>ESPA2-LD-4040</b> | <b>NF (1)<br/>Toray<br/>CSM NE4040-40</b> | <b>NF (2)<br/>Dupont<br/>Filmtec NF270</b> |
|------------------------------|--------------|----------------------------------------------|-------------------------------------------|--------------------------------------------|
| Feed Flow (FF)               | gpm          | 8.20                                         | 9.42                                      | 9.29                                       |
| Recycle Flow (RF)            | gpm          | 0.92                                         | 1.00                                      | 0.92                                       |
| Permeate Flow (PF)           | gpm          | 0.89                                         | 1.03                                      | 1.03                                       |
| Concentrate Flow (CF)        | gpm          | 6.39                                         | 7.38                                      | 7.34                                       |
| Recovery (PF/FF)             | %            | 10.8%                                        | 10.9%                                     | 11.1%                                      |
| Flux                         | gfd          | 15.9                                         | 17.5                                      | 18.1                                       |
| Feed Pressure                | psi          | 138                                          | 93                                        | 50                                         |
| Molecular Weight Cutoff      | Da           | 100–200 <sup>a</sup>                         | 320–350 <sup>b</sup>                      | 155–400 <sup>c</sup>                       |

<sup>a</sup>References: [1]–[3]. <sup>b</sup>Reference: [4]. <sup>c</sup>References: [5]–[9].

**Table S3.** Summary of the experimental conditions for the three spiking experiments.

| <b>Spiking Experiment</b> | <b>Membrane</b>            | <b>Type</b> | <b>DNA Nanostructure Formulation<sup>a</sup></b> |
|---------------------------|----------------------------|-------------|--------------------------------------------------|
| 1                         | Hydranautics ESPA2-LD-4040 | RO          | GP, NL, NS                                       |
|                           | CSM NE4040-40              | NF1         | GP, NL, NS                                       |
|                           | Filmtec NF270              | NF2         | GP, NL, NS                                       |
| 2                         | Hydranautics ESPA2-LD-4040 | RO          | GP, NL, NS                                       |
|                           | CSM NE4040-40              | NF1         | GP, NL, NS                                       |
| 3                         | Hydranautics ESPA2-LD-4040 | RO          | GP, NL, OLS                                      |
|                           | CSM NE4040-40              | NF1         | GP, NL, OLS                                      |

<sup>a</sup>GP: gel-purified; NL: non-labeled; NS: non-stabilized; OLS: oligolysine-stabilized.

**Figure S2. (Left)** Illustration of the DNA nanostructure “Gear” shape and **(Right)** transmission electron microscope (TEM) photograph of the synthesized structures after gel purification. **Source:** tilibit nanosystems synthesis report.

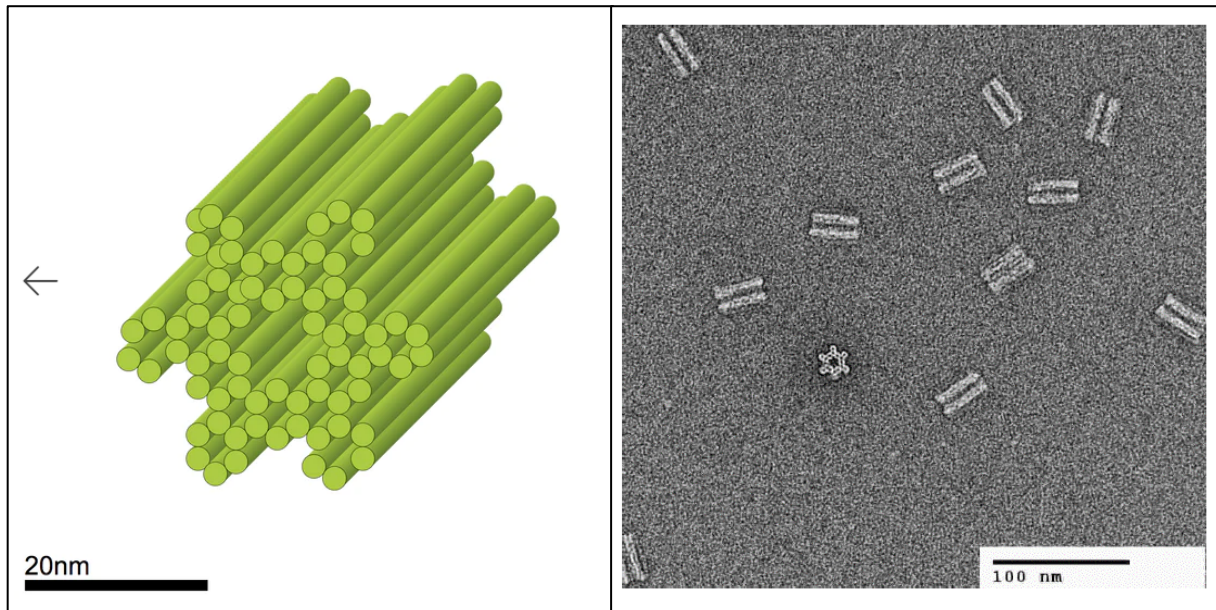

**Text S1.** QA/QC for molecular analyses.

**Standards and Equivalent Sample Volumes (ESVs).** Standards were purchased from Integrated DNA Technologies (IDT, Coralville, IA) as gBlock Gene Fragments (**Table S4**) and processed according to manufacturer's instructions. The gBlock Gene Fragments were resuspended in 1X TE buffer to target a concentration of 10 ng/ $\mu\text{L}$ . This concentration was further verified by quantification with a Qubit 4 Fluorometer and the dsDNA HS Assay Kit (Invitrogen). ThermoFisher's DNA Copy Number and Dilution Calculator ([DNA copy number calculator](#)) was then used to dilute each standard to a working stock of  $10^8$  gene copies (gc)/ $\mu\text{L}$  based on the stock concentration and fragment size. The working stocks were serially diluted down to  $10^1$  gc/ $\mu\text{L}$  for MS2 or  $10^2$  gc/ $\mu\text{L}$  for the DNA nanostructures to generate assay-specific standard curves (see **Figure S3** for nanostructure standard curves). For the SYBR-based nanostructure assays, the intercalating dye requires dsDNA to fluoresce. Thus, to account for the difference in structure between the dsDNA gBlock Gene Fragments and the ssDNA nanostructures, observed starting quantities for the nanostructures (as determined from the qPCR instrument) were multiplied by two. For all qPCR assays, starting quantities were converted to reaction-specific concentrations (in gc/reaction) using standard curves, and sample-specific concentrations were calculated based on equivalent sample volumes (ESVs). **Equations S1-S3** define the ESVs for the (1) RT-qPCR analyses for MS2, (2) the direct extraction qPCR analyses for the nanostructures, and (3) the direct quantification qPCR analyses for the nanostructures, respectively.

**Equation S1.** Equivalent sample volume (ESV) calculation for direct extraction and RT-qPCR analysis of spiked MS2 bacteriophage.

$$\text{ESV (mL)} = \frac{1 \mu\text{L cDNA template}}{20 \mu\text{L total cDNA}} \times \frac{5 \mu\text{L reverse transcription template}}{60 \mu\text{L nucleic acid eluate}} \times 350 \mu\text{L sample} \times \frac{1 \text{ mL}}{1000 \mu\text{L}} = 0.001458 \text{ mL}$$

**Equation S2.** Equivalent sample volume (ESV) calculation for direct extraction and qPCR analysis of spiked nanostructures.

$$\text{ESV (mL)} = \frac{1 \mu\text{L DNA template}}{60 \mu\text{L nucleic acid eluate}} \times 350 \mu\text{L sample} \times \frac{1 \text{ mL}}{1000 \mu\text{L}} = 0.005833 \text{ mL}$$

**Equation S3.** Equivalent sample volume (ESV) calculation for direct qPCR analysis of spiked nanostructures.

$$\text{ESV (mL)} = 1 \mu\text{L sample} \times \frac{1 \text{ mL}}{1000 \mu\text{L}} = 0.001000 \text{ mL}$$

**Table S4.** Sequences used for gBlock Gene Fragment standards for the MS2 and DNA nanostructure assays.

| Standard Name   | Sequence                                                                                                                                                                                                                       | Length (bp) |
|-----------------|--------------------------------------------------------------------------------------------------------------------------------------------------------------------------------------------------------------------------------|-------------|
| MS2_STD         | TAAAGTCTCCTTTCTCGATGGTCCATACCTTAGATGCGTTAGC<br>ATTAATCAGGCAACGGCTCTCTAGATAGAGCCCTCAACCGGA<br>GTTTGAAGCATGGCTTCTAACTTTACTCAGTTCGTTCTCGTCG<br>ACAATGGCGGAACTGGCGACGTGACTGTCGCCCAAGCAAC<br>TTCGCTAACGGGGTCGCTGAATGGATCAGCT        | 160         |
| p7249-8064_STD1 | AAACCATCTCAAGCCCAATTTACTACTCGTTCTGGTGTTTCTC<br>GTCAGGGCAAGCCTTATTCCTGAATGAGCAGCTTTGTTACG<br>TTGATTTGGGTAATGAATATCCGGTTCCTTGCAAGATTACTCT<br>TGATGAAGGTCAGCCAGCCTATGCGCCTGGTCTGTACACCGT<br>TCATCTGTCCTCTTTCAAAGTTGGTCAGTTCGGTTCC | 163         |
| p7249-8064_STD2 | TCGGTACTTTATATTCTTATTACTGGCTCGAAAATGCCTCT<br>GCCTAAATTACATGTTGGCGTTGTTAAATATGGCGATTCTCA<br>ATTAAGCCCTACTGTTGAGCGTTGGCTTTACTGGTAAGAA<br>TTTGTATAACGCATATGAT                                                                     | 98          |

\*STD1 and STD2 were used for nanostructure assays 1 and 2, respectively (see Table 1 in main text for assays).

**Figure S3.** Regression and amplification curves for the two SYBR-based qPCR assays used for DNA nanostructure quantification. The curves illustrate the amplifications of the gBlock Gene Fragments used in assay development and to generate standard calibration curves for quantification.

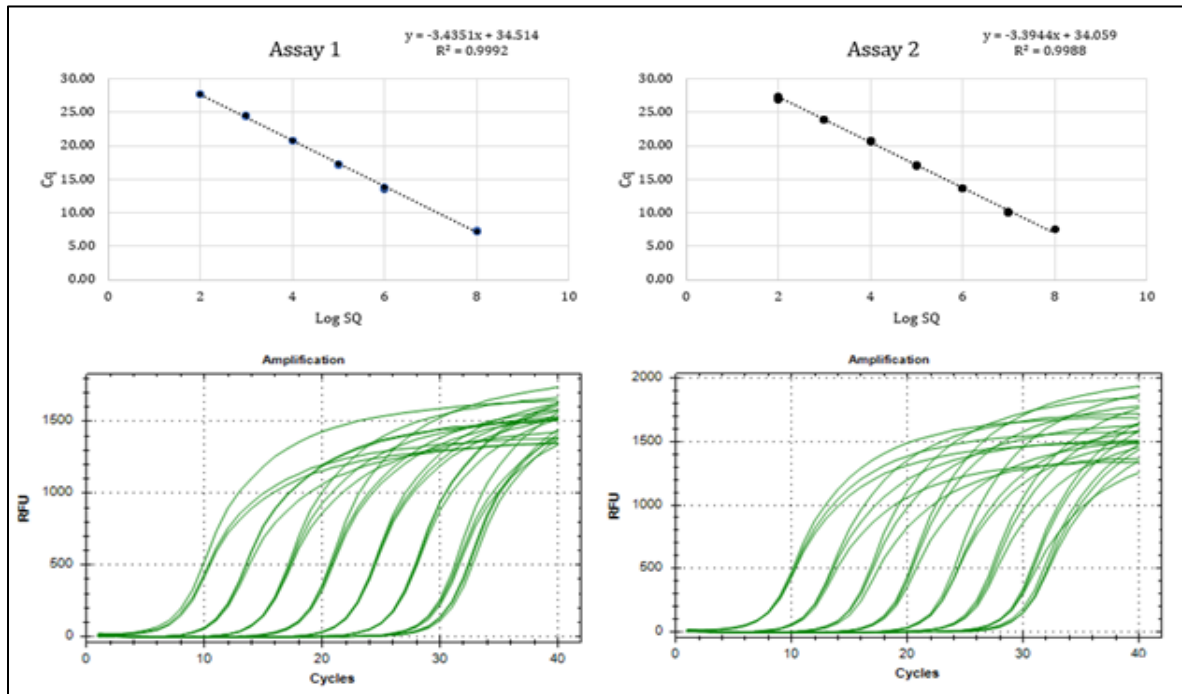

**No Template Control (NTC) Amplification.** Each standard curve included a no template control (NTC) and was run in triplicate alongside samples. All NTCs included in the MS2 qPCR assay exhibited no amplification, as expected. In contrast, NTCs for both nanostructure (NS) assays showed amplification

(C<sub>q</sub> = 28.78 for NS assay 1 and C<sub>q</sub> = 28.25 for NS assay 2), and this background signal was eventually linked to the SYBR-based mastermix. We hypothesized that this false-positive signal could be eliminated by pretreatment of the iTaq Universal SYBR Green Supermix (Bio-Rad Laboratories) with DNase I. To test this hypothesis, 150 μL of the iTaq Universal SYBR Green Supermix was incubated with 17 μL of buffer containing MgCl<sub>2</sub> (a component of the DNase I kit) and 3 μL of DNase I at 37°C for 30 minutes, followed by 10 minutes at 65°C. In a separate control, 150 μL of the iTaq Universal SYBR Green Supermix was incubated with 17 μL of the buffer and 3 μL of water (instead of DNase I). This pretreatment step successfully eliminated NTC amplification but also reduced the overall performance of the NS assays, thereby negating its benefits. Instead of implementing this DNase I pretreatment, sample data were adjusted for the background signal originating from the mastermix (i.e., by subtracting the background gc quantity) to obtain nanostructure-specific concentrations.

**Limits of Quantification (LoQs).** Limits of quantification (LoQs) were determined for all assays by analyzing a set of test samples (i.e., standards) with known concentrations ranging from 1,000 to 1 gc/μL and comparing against NTCs and blanks in 9 replicates. The LoQ values (**Table S5**) were determined using a statistical t-test with 99% confidence, as per the U.S. EPA (Method Detection Limit Procedure – Revision 2 outlined in 40 CFR Part 136 Appendix B). For any sample that was determined to be non-detect or <LoQ during the membrane study, the LoQs in **Table S5** were imputed for those left-censored datapoints and used to calculate corresponding log reduction values (LRVs).

**Table S5.** Limits of quantification (LoQs) for the MS2 and nanostructure qPCR assays. The nanostructures were analyzed with and without direct extraction.

| qPCR Assay                                                        | Reaction LoQ (gc/reaction) | ESV (mL) | Sample LoQ <sup>b</sup> (gc/mL) |
|-------------------------------------------------------------------|----------------------------|----------|---------------------------------|
| Direct Extraction MS2 <sup>c</sup>                                | 9                          | 0.001458 | 6.17×10 <sup>3</sup>            |
| Direct Extraction Nanostructures                                  | 62 <sup>a</sup>            | 0.005833 | 1.06×10 <sup>4</sup>            |
| Direct Quantification (No Extraction) Nanostructures <sup>c</sup> | 62 <sup>a</sup>            | 0.001000 | 6.20×10 <sup>4</sup>            |

<sup>a</sup>Nanostructure LoQ accounts for background (NTC) amplification from mastermix for assay 1.

<sup>b</sup>Sample LoQ accounts for equivalent sample volume (ESV) in each qPCR reaction.

<sup>c</sup>Primary methods selected for sample analysis.

**Table S6.** MS2 concentrations for experiment samples as determined by **(top)** culturing, **(middle)** RT-qPCR without RNase treatment, and **(bottom)** RT-qPCR with RNase treatment prior to nucleic acid extraction. Red font indicates concentrations that were below the limit of quantification (LoQ).

| MS2 CULTURE |        | RO (PFU/ml) |          |          |      | NF1 (PFU/ml) |          |          |      | NF2 (PFU/ml) |          |          |      |
|-------------|--------|-------------|----------|----------|------|--------------|----------|----------|------|--------------|----------|----------|------|
| Experiment  | Sample | Tank        | Feed     | Permeate | LRV  | Tank         | Feed     | Permeate | LRV  | Tank         | Feed     | Permeate | LRV  |
| 1           | 0      | 6.33E+05    | --       | --       | --   | 2.74E+06     | --       | --       | --   | 1.54E+06     | --       | --       | --   |
|             | 1      | --          | 1.63E+06 | 3.78E+00 | 5.64 | --           | 1.73E+06 | 3.33E-01 | 6.71 | --           | 7.47E+05 | 2.89E+00 | 5.41 |
|             | 2      | --          | 9.40E+05 | 6.67E+01 | 4.15 | --           | 1.10E+06 | 1.44E+00 | 5.88 | --           | 7.67E+05 | 1.29E+01 | 4.77 |
|             | 3      | --          | 1.39E+06 | 4.44E-01 | 6.50 | --           | 1.03E+06 | 1.78E+00 | 5.76 | --           | 7.00E+05 | 4.44E-01 | 6.20 |
|             | Avg.   | --          | 1.32E+06 | 2.36E+01 | 5.43 | --           | 1.28E+06 | 1.19E+00 | 6.12 | --           | 7.38E+05 | 5.41E+00 | 5.46 |
| 2           | 0      | --          | --       | --       | --   | --           | --       | --       | --   | --           | --       | --       | --   |
|             | 1      | --          | 1.16E+06 | 6.25E+01 | 4.27 | --           | 1.23E+06 | 4.40E+03 | 2.45 | --           | --       | --       | --   |
|             | 2      | --          | 1.03E+06 | 2.55E+01 | 4.61 | --           | 1.10E+06 | 7.17E+00 | 5.18 | --           | --       | --       | --   |
|             | 3      | --          | 1.02E+06 | 1.78E+01 | 4.76 | --           | 1.10E+06 | 4.83E+00 | 5.36 | --           | --       | --       | --   |
|             | Avg.   | --          | 1.07E+06 | 3.53E+01 | 4.55 | --           | 1.14E+06 | 1.47E+03 | 4.33 | --           | --       | --       | --   |
| 3           | 0      | --          | --       | --       | --   | --           | --       | --       | --   | --           | --       | --       | --   |
|             | 1      | --          | 1.05E+06 | 5.00E-01 | 6.32 | --           | 1.03E+06 | 6.33E+00 | 5.21 | --           | --       | --       | --   |
|             | 2      | --          | 1.15E+06 | 9.50E+00 | 5.08 | --           | 1.16E+06 | 1.50E+00 | 5.89 | --           | --       | --       | --   |
|             | 3      | --          | 1.06E+06 | 5.00E-01 | 6.33 | --           | 1.07E+06 | 6.00E+00 | 5.25 | --           | --       | --       | --   |
|             | Avg.   | --          | 1.09E+06 | 3.50E+00 | 5.91 | --           | 1.09E+06 | 4.61E+00 | 5.45 | --           | --       | --       | --   |

  

| MS2 MOLECULAR |        | RO (gc/ml) |          |          |      | NF1 (gc/ml) |          |          |      | NF2 (gc/ml) |          |          |      |
|---------------|--------|------------|----------|----------|------|-------------|----------|----------|------|-------------|----------|----------|------|
| Experiment    | Sample | Tank       | Feed     | Permeate | LRV  | Tank        | Feed     | Permeate | LRV  | Tank        | Feed     | Permeate | LRV  |
| 1             | 0      | 2.36E+07   | --       | --       | --   | 1.36E+08    | --       | --       | --   | 1.21E+08    | --       | --       | --   |
|               | 1      | --         | 1.01E+08 | 6.17E+03 | 4.21 | --          | 9.72E+07 | 6.17E+03 | 4.20 | --          | 7.67E+07 | 6.17E+03 | 4.09 |
|               | 2      | --         | 1.23E+08 | 6.17E+03 | 4.30 | --          | 7.48E+07 | 6.17E+03 | 4.08 | --          | 4.68E+07 | 6.17E+03 | 3.88 |
|               | 3      | --         | 6.87E+07 | 6.17E+03 | 4.05 | --          | 6.78E+07 | 6.17E+03 | 4.04 | --          | 5.31E+07 | 6.17E+03 | 3.93 |
|               | Avg.   | --         | 9.76E+07 | 6.17E+03 | 4.19 | --          | 7.99E+07 | 6.17E+03 | 4.11 | --          | 5.89E+07 | 6.17E+03 | 3.97 |
| 2             | 0      | --         | --       | --       | --   | --          | --       | --       | --   | --          | --       | --       | --   |
|               | 1      | --         | 1.77E+08 | 6.17E+03 | 4.46 | --          | 1.57E+08 | 7.24E+04 | 3.34 | --          | --       | --       | --   |
|               | 2      | --         | 1.29E+08 | 6.66E+03 | 4.29 | --          | 1.50E+08 | 6.17E+03 | 4.39 | --          | --       | --       | --   |
|               | 3      | --         | 1.66E+08 | 6.17E+03 | 4.43 | --          | 1.43E+08 | 6.17E+03 | 4.37 | --          | --       | --       | --   |
|               | Avg.   | --         | 1.57E+08 | 6.33E+03 | 4.39 | --          | 1.50E+08 | 2.82E+04 | 4.03 | --          | --       | --       | --   |
| 3             | 0      | --         | --       | --       | --   | --          | --       | --       | --   | --          | --       | --       | --   |
|               | 1      | --         | 1.19E+08 | 6.17E+03 | 4.29 | --          | 1.72E+08 | 6.17E+03 | 4.45 | --          | --       | --       | --   |
|               | 2      | --         | 9.80E+07 | 6.17E+03 | 4.20 | --          | 1.34E+08 | 6.17E+03 | 4.34 | --          | --       | --       | --   |
|               | 3      | --         | 1.85E+08 | 6.17E+03 | 4.48 | --          | 1.41E+08 | 6.17E+03 | 4.36 | --          | --       | --       | --   |
|               | Avg.   | --         | 1.34E+08 | 6.17E+03 | 4.32 | --          | 1.49E+08 | 6.17E+03 | 4.38 | --          | --       | --       | --   |

  

| MS2 MOLECULAR (RNase) |        | RO (gc/ml) |          |          |      | NF1 (gc/ml) |          |          |      | NF2 (gc/ml) |          |          |      |
|-----------------------|--------|------------|----------|----------|------|-------------|----------|----------|------|-------------|----------|----------|------|
| Experiment            | Sample | Tank       | Feed     | Permeate | LRV  | Tank        | Feed     | Permeate | LRV  | Tank        | Feed     | Permeate | LRV  |
| 1                     | 0      | 4.40E+07   | --       | --       | --   | 4.01E+07    | --       | --       | --   | 6.18E+07    | --       | --       | --   |
|                       | 1      | --         | 4.89E+07 | 6.17E+03 | 3.90 | --          | 3.46E+07 | 6.17E+03 | 3.75 | --          | 3.63E+07 | 6.17E+03 | 3.77 |
|                       | 2      | --         | 6.73E+07 | 6.17E+03 | 4.04 | --          | 3.55E+07 | 6.17E+03 | 3.76 | --          | 2.73E+07 | 6.17E+03 | 3.65 |
|                       | 3      | --         | 4.05E+07 | 6.17E+03 | 3.82 | --          | 2.99E+07 | 6.17E+03 | 3.69 | --          | 2.63E+07 | 6.17E+03 | 3.63 |
|                       | Avg.   | --         | 5.22E+07 | 6.17E+03 | 3.92 | --          | 3.33E+07 | 6.17E+03 | 3.73 | --          | 3.00E+07 | 6.17E+03 | 3.68 |
| 2                     | 0      | --         | --       | --       | --   | --          | --       | --       | --   | --          | --       | --       | --   |
|                       | 1      | --         | 1.80E+08 | 1.46E+04 | 4.09 | --          | 1.26E+08 | 9.41E+04 | 3.13 | --          | --       | --       | --   |
|                       | 2      | --         | 1.11E+08 | 6.17E+03 | 4.26 | --          | 1.15E+08 | 6.17E+03 | 4.27 | --          | --       | --       | --   |
|                       | 3      | --         | 1.42E+08 | 6.17E+03 | 4.36 | --          | 1.16E+08 | 6.54E+03 | 4.25 | --          | --       | --       | --   |
|                       | Avg.   | --         | 1.44E+08 | 8.98E+03 | 4.24 | --          | 1.19E+08 | 3.56E+04 | 3.88 | --          | --       | --       | --   |
| 3                     | 0      | --         | --       | --       | --   | --          | --       | --       | --   | --          | --       | --       | --   |
|                       | 1      | --         | 9.73E+07 | 6.17E+03 | 4.20 | --          | 1.19E+08 | 6.17E+03 | 4.29 | --          | --       | --       | --   |
|                       | 2      | --         | 1.15E+08 | 6.17E+03 | 4.27 | --          | 1.13E+08 | 6.17E+03 | 4.26 | --          | --       | --       | --   |
|                       | 3      | --         | 1.18E+08 | 6.17E+03 | 4.28 | --          | 1.04E+08 | 6.17E+03 | 4.23 | --          | --       | --       | --   |
|                       | Avg.   | --         | 1.10E+08 | 6.17E+03 | 4.25 | --          | 1.12E+08 | 6.17E+03 | 4.26 | --          | --       | --       | --   |



**Table S7.** Comparison of qPCR assays for quantification of nanostructure spiking stock.

| Experiment | Nanostructure Processing |                | Assay 1 <sup>a</sup>       | Assay 2                    |
|------------|--------------------------|----------------|----------------------------|----------------------------|
|            | Purification             | Stabilization  | Mean ± SD (gc/mL)          | Mean ± SD (gc/mL)          |
| 1          | Gel-purified             | Non-stabilized | (2.1±0.3)×10 <sup>13</sup> | (1.7±0.2)×10 <sup>13</sup> |
| 2          | Gel-purified             | Non-stabilized | (8.5±0.8)×10 <sup>13</sup> | (8.9±0.9)×10 <sup>13</sup> |
| 3          | Gel-purified             | Oligolysine    | (5.8±0.8)×10 <sup>13</sup> | (5.9±0.8)×10 <sup>13</sup> |

<sup>a</sup>Nanostructure assay 1 was ultimately selected for quantifying DNA nanostructures in experimental samples.

**Table S8.** Nanostructure concentrations as determined by qPCR for experiment samples with **(top)** direct quantification (i.e., no nucleic acid extraction) without DNase treatment, **(middle)** direct extraction without DNase treatment, and **(bottom)** direct quantification (i.e., no nucleic acid extraction) with DNase treatment. Red font indicates concentrations that were below the limit of quantification (LoQ).

| NS MOLECULAR (No Extraction)             |        | RO (gc/mL) |          |          |      | NF1 (gc/mL) |          |          |      | NF2 (gc/mL) |          |          |      |
|------------------------------------------|--------|------------|----------|----------|------|-------------|----------|----------|------|-------------|----------|----------|------|
| Experiment                               | Sample | Tank       | Feed     | Permeate | LRV  | Tank        | Feed     | Permeate | LRV  | Tank        | Feed     | Permeate | LRV  |
| 1<br>(Old, Gel-Purified, Non-Stabilized) | 0      | 1.05E+05   | --       | --       | --   | 6.56E+06    | --       | --       | --   | 2.77E+05    | --       | --       | --   |
|                                          | 1      | --         | 5.39E+06 | 6.20E+04 | 1.94 | --          | 4.59E+05 | 6.20E+04 | 0.87 | --          | 8.46E+04 | 6.20E+04 | 0.13 |
|                                          | 2      | --         | 4.60E+06 | 6.20E+04 | 1.87 | --          | 2.24E+05 | 6.20E+04 | 0.56 | --          | 8.59E+04 | 6.20E+04 | 0.14 |
|                                          | 3      | --         | 1.13E+06 | 6.20E+04 | 1.26 | --          | 9.87E+04 | 6.20E+04 | 0.20 | --          | 7.00E+04 | 6.20E+04 | 0.05 |
|                                          | Avg.   | --         | 3.71E+06 | 6.20E+04 | 1.69 | --          | 2.61E+05 | 6.20E+04 | 0.54 | --          | 8.02E+04 | 6.20E+04 | 0.11 |
| 2<br>(New, Gel-Purified, Non-Stabilized) | 0      | --         | --       | --       | --   | --          | --       | --       | --   | --          | --       | --       | --   |
|                                          | 1      | --         | 2.27E+08 | 6.20E+04 | 3.56 | --          | 7.70E+05 | 8.85E+04 | 0.94 | --          | --       | --       | --   |
|                                          | 2      | --         | 1.55E+08 | 6.20E+04 | 3.40 | --          | 2.15E+05 | 1.01E+05 | 0.33 | --          | --       | --       | --   |
|                                          | 3      | --         | 7.00E+07 | 6.20E+04 | 3.05 | --          | 1.73E+05 | 7.64E+04 | 0.35 | --          | --       | --       | --   |
|                                          | Avg.   | --         | 1.51E+08 | 6.20E+04 | 3.34 | --          | 3.86E+05 | 8.86E+04 | 0.54 | --          | --       | --       | --   |
| 3<br>(New, Gel-Purified, Stabilized)     | 0      | --         | --       | --       | --   | --          | --       | --       | --   | --          | --       | --       | --   |
|                                          | 1      | --         | 4.14E+07 | 1.10E+05 | 2.58 | --          | 1.27E+06 | 6.20E+04 | 1.31 | --          | --       | --       | --   |
|                                          | 2      | --         | 4.82E+07 | 6.20E+04 | 2.89 | --          | 3.12E+05 | 7.06E+04 | 0.65 | --          | --       | --       | --   |
|                                          | 3      | --         | 2.16E+07 | 6.20E+04 | 2.54 | --          | 1.35E+05 | 6.70E+04 | 0.30 | --          | --       | --       | --   |
|                                          | Avg.   | --         | 3.71E+07 | 7.80E+04 | 2.67 | --          | 5.72E+05 | 6.65E+04 | 0.75 | --          | --       | --       | --   |

| NS MOLECULAR (Extraction)                |        | RO (gc/mL) |          |          |      | NF1 (gc/mL) |          |          |      | NF2 (gc/mL) |          |          |      |
|------------------------------------------|--------|------------|----------|----------|------|-------------|----------|----------|------|-------------|----------|----------|------|
| Experiment                               | Sample | Tank       | Feed     | Permeate | LRV  | Tank        | Feed     | Permeate | LRV  | Tank        | Feed     | Permeate | LRV  |
| 1<br>(Old, Gel-Purified, Non-Stabilized) | 0      | 3.84E+03   | --       | --       | --   | 3.08E+06    | --       | --       | --   | 3.44E+04    | --       | --       | --   |
|                                          | 1      | --         | 6.60E+05 | 1.06E+04 | 1.79 | --          | 1.43E+05 | 1.06E+04 | 1.13 | --          | 1.06E+04 | 1.06E+04 | 0.00 |
|                                          | 2      | --         | 7.67E+05 | 1.31E+04 | 1.77 | --          | 4.65E+04 | 1.06E+04 | 0.64 | --          | 1.06E+04 | 1.06E+04 | 0.00 |
|                                          | 3      | --         | 4.73E+05 | 1.06E+04 | 1.65 | --          | 1.06E+04 | 1.06E+04 | 0.00 | --          | 1.06E+04 | 1.06E+04 | 0.00 |
|                                          | Avg.   | --         | 6.33E+05 | 1.14E+04 | 1.74 | --          | 6.67E+04 | 1.06E+04 | 0.59 | --          | 1.06E+04 | 1.06E+04 | 0.00 |
| 2<br>(New, Gel-Purified, Non-Stabilized) | 0      | --         | --       | --       | --   | --          | --       | --       | --   | --          | --       | --       | --   |
|                                          | 1      | --         | 5.87E+07 | 1.06E+04 | 3.74 | --          | 4.38E+05 | 1.66E+04 | 1.42 | --          | --       | --       | --   |
|                                          | 2      | --         | 3.64E+07 | 1.15E+04 | 3.50 | --          | 4.64E+04 | 1.06E+04 | 0.64 | --          | --       | --       | --   |
|                                          | 3      | --         | 2.31E+07 | 1.32E+04 | 3.24 | --          | 1.28E+04 | 1.06E+04 | 0.08 | --          | --       | --       | --   |
|                                          | Avg.   | --         | 3.94E+07 | 1.18E+04 | 3.50 | --          | 1.66E+05 | 1.26E+04 | 0.71 | --          | --       | --       | --   |
| 3<br>(New, Gel-Purified, Stabilized)     | 0      | --         | --       | --       | --   | --          | --       | --       | --   | --          | --       | --       | --   |
|                                          | 1      | --         | 9.22E+06 | 1.61E+04 | 2.76 | --          | 1.99E+05 | 1.13E+04 | 1.25 | --          | --       | --       | --   |
|                                          | 2      | --         | 1.07E+07 | 1.53E+04 | 2.84 | --          | 6.80E+04 | 1.06E+04 | 0.81 | --          | --       | --       | --   |
|                                          | 3      | --         | 2.39E+06 | 1.17E+04 | 2.31 | --          | 1.41E+04 | 1.06E+04 | 0.12 | --          | --       | --       | --   |
|                                          | Avg.   | --         | 7.44E+06 | 1.44E+04 | 2.64 | --          | 9.37E+04 | 1.08E+04 | 0.73 | --          | --       | --       | --   |

| NS MOLECULAR (DNase)                     |        | RO (gc/mL) |          |          |      | NF1 (gc/mL) |          |          |      | NF2 (gc/mL) |      |          |     |
|------------------------------------------|--------|------------|----------|----------|------|-------------|----------|----------|------|-------------|------|----------|-----|
| Experiment                               | Sample | Tank       | Feed     | Permeate | LRV  | Tank        | Feed     | Permeate | LRV  | Tank        | Feed | Permeate | LRV |
| 1<br>(Old, Gel-Purified, Non-Stabilized) | 0      | --         | --       | --       | --   | --          | --       | --       | --   | --          | --   | --       | --  |
|                                          | 1      | --         | --       | --       | --   | --          | --       | --       | --   | --          | --   | --       | --  |
|                                          | 2      | --         | --       | --       | --   | --          | --       | --       | --   | --          | --   | --       | --  |
|                                          | 3      | --         | --       | --       | --   | --          | --       | --       | --   | --          | --   | --       | --  |
|                                          | Avg.   | --         | --       | --       | --   | --          | --       | --       | --   | --          | --   | --       | --  |
| 2<br>(New, Gel-Purified, Non-Stabilized) | 0      | --         | --       | --       | --   | --          | --       | --       | --   | --          | --   | --       | --  |
|                                          | 1      | --         | 4.62E+05 | 6.20E+04 | 0.87 | --          | 2.02E+05 | 6.20E+04 | 0.51 | --          | --   | --       | --  |
|                                          | 2      | --         | 5.06E+05 | 6.20E+04 | 0.91 | --          | 1.55E+05 | 9.87E+04 | 0.20 | --          | --   | --       | --  |
|                                          | 3      | --         | 5.33E+05 | 6.20E+04 | 0.93 | --          | 1.77E+05 | 1.03E+05 | 0.24 | --          | --   | --       | --  |
|                                          | Avg.   | --         | 5.00E+05 | 6.20E+04 | 0.91 | --          | 1.78E+05 | 8.79E+04 | 0.31 | --          | --   | --       | --  |
| 3<br>(New, Gel-Purified, Stabilized)     | 0      | --         | --       | --       | --   | --          | --       | --       | --   | --          | --   | --       | --  |
|                                          | 1      | --         | 6.40E+05 | 6.20E+04 | 1.01 | --          | 2.56E+05 | 8.87E+04 | 0.46 | --          | --   | --       | --  |
|                                          | 2      | --         | 4.34E+05 | 6.20E+04 | 0.85 | --          | 1.73E+05 | 7.49E+04 | 0.36 | --          | --   | --       | --  |
|                                          | 3      | --         | 4.68E+05 | 6.20E+04 | 0.88 | --          | 1.32E+05 | 6.20E+04 | 0.33 | --          | --   | --       | --  |
|                                          | Avg.   | --         | 5.14E+05 | 6.20E+04 | 0.91 | --          | 1.87E+05 | 7.52E+04 | 0.38 | --          | --   | --       | --  |

## References

- (1) Albergamo, V.; Blankert, B.; Cornelissen, E. R.; Hof, B.; Knibbe, W.-J.; van der Meer, W.; de Voogt, P. Removal of Polar Organic Micropollutants by Pilot-Scale Reverse Osmosis Drinking Water Treatment. *Water Res* 2019, 148, 535–545. <https://doi.org/https://doi.org/10.1016/j.watres.2018.09.029>.
- (2) Albergamo, V.; Escher, B. I.; Schymanski, E. L.; Helmus, R.; Dingemans, M. M. L.; Cornelissen, E. R.; Kraak, M. H. S.; Hollender, J.; de Voogt, P. Evaluation of Reverse Osmosis Drinking Water Treatment of Riverbank Filtrate Using Bioanalytical Tools and Non-Target Screening. *Environ Sci (Camb)* 2020, 6 (1), 103–116. <https://doi.org/10.1039/C9EW00741E>.
- (3) Yangali-Quintanilla, V.; Maeng, S. K.; Fujioka, T.; Kennedy, M.; Amy, G. Proposing Nanofiltration as Acceptable Barrier for Organic Contaminants in Water Reuse. *J Memb Sci* 2010, 362 (1), 334–345. <https://doi.org/https://doi.org/10.1016/j.memsci.2010.06.058>.
- (4) Sahoo, A.; Puhan, M. R.; Vasave, D. B.; Borle, N. G.; Sutariya, B.; Karan, S. Harnessing the Potential of Thin Film Composite Membranes for Efficient Treatment of Aqueous Streams Containing Polar Aprotic Organic Solvents. *Chemical Papers* 2024, 78 (2), 793–808. <https://doi.org/10.1007/s11696-023-03121-7>.
- (5) Boussu, K.; Zhang, Y.; Cocquyt, J.; Van der Meeren, P.; Volodin, A.; Van Haesendonck, C.; Martens, J. A.; Van der Bruggen, B. Characterization of Polymeric Nanofiltration Membranes for Systematic Analysis of Membrane Performance. *J Memb Sci* 2006, 278 (1), 418–427. <https://doi.org/https://doi.org/10.1016/j.memsci.2005.11.027>.
- (6) Park, N.; Kwon, B.; Kim, I. S.; Cho, J. Biofouling Potential of Various NF Membranes with Respect to Bacteria and Their Soluble Microbial Products (SMP): Characterizations, Flux Decline, and Transport Parameters. *J Memb Sci* 2005, 258 (1), 43–54. <https://doi.org/https://doi.org/10.1016/j.memsci.2005.02.025>.
- (7) Choi, J.-H.; Fukushi, K.; Yamamoto, K. A Study on the Removal of Organic Acids from Wastewaters Using Nanofiltration Membranes. *Sep Purif Technol* 2008, 59 (1), 17–25. <https://doi.org/https://doi.org/10.1016/j.seppur.2007.05.021>.
- (8) Dalwani, M.; Benes, N. E.; Bargeman, G.; Stamatialis, D.; Wessling, M. A Method for Characterizing Membranes during Nanofiltration at Extreme PH. *J Memb Sci* 2010, 363 (1), 188–194. <https://doi.org/https://doi.org/10.1016/j.memsci.2010.07.025>.
- (9) Nguyen, L. D.; Gassara, S.; Bui, M. Q.; Zaviska, F.; Sizat, P.; Deratani, A. Desalination and Removal of Pesticides from Surface Water in Mekong Delta by Coupling Electrodialysis and Nanofiltration. *Environmental Science and Pollution Research* 2019, 26 (32), 32687–32697. <https://doi.org/10.1007/s11356-018-3918-6>.
